# Supplementary material
Source: PubMed Central journal article supplement (PMC5655105)
Supplement: AAC.00709-17_zac011176675s1.pdf [file AAC.00709-17_zac011176675s1.pdf]

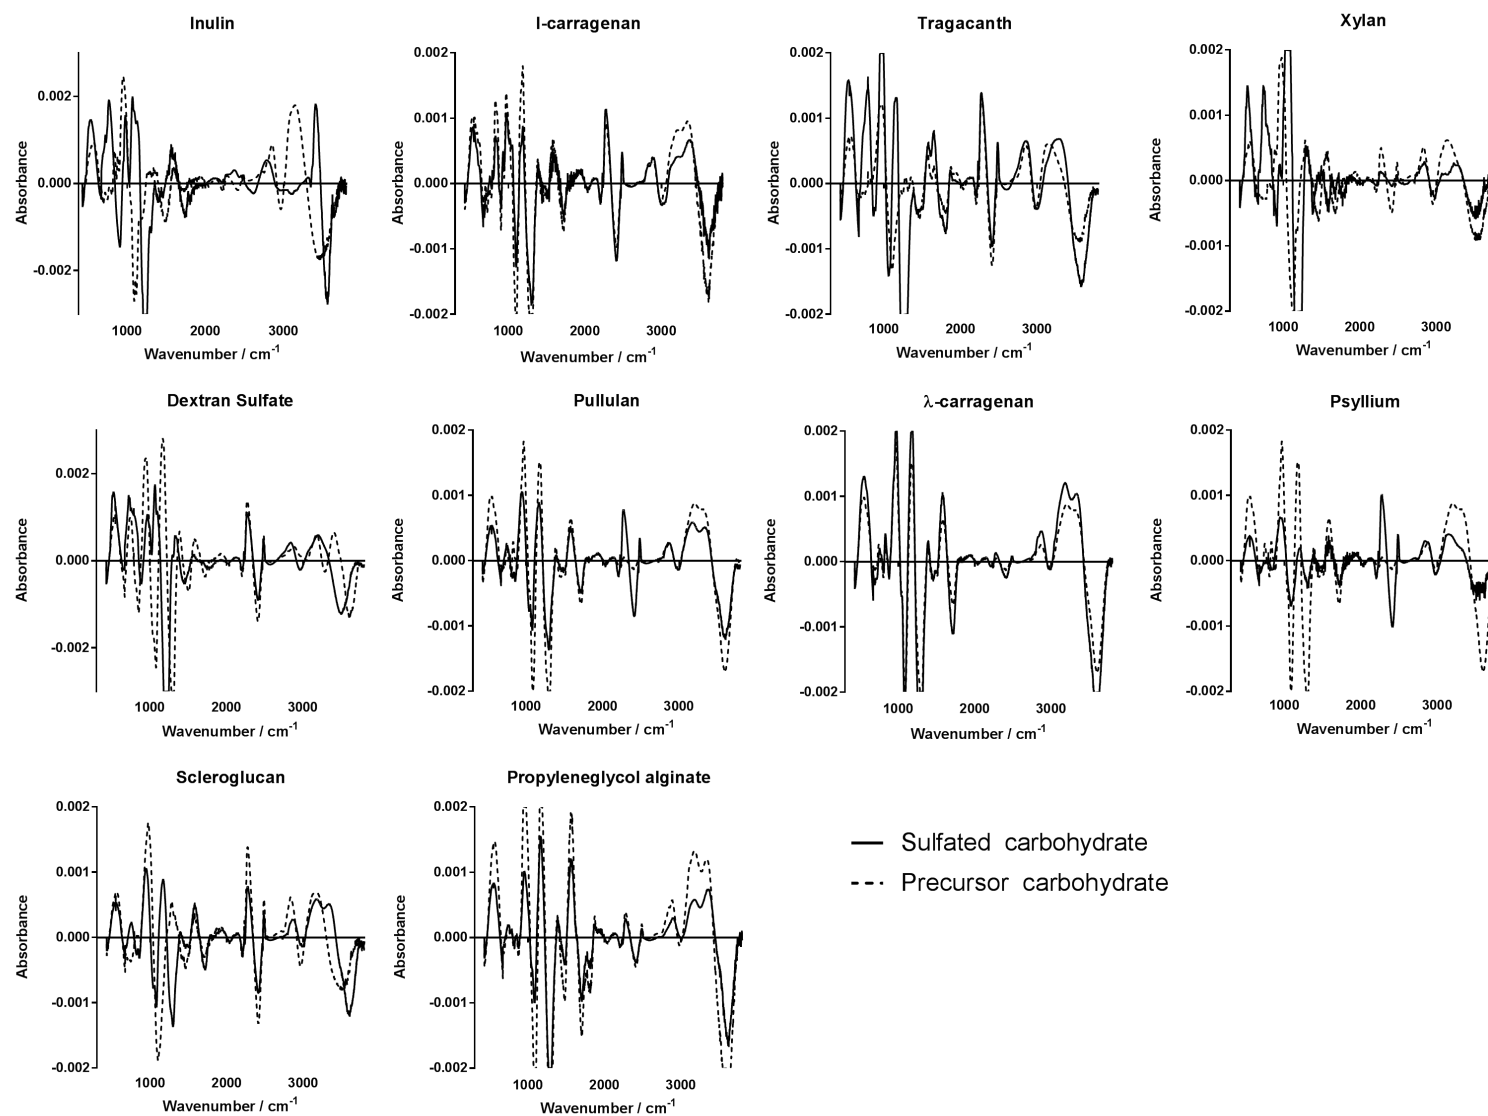

**Supplementary Figure 1: FTIR-ATR spectra.** 1st derivative plots; 5 x 32 scans for both precursor and sulphated carbohydrates that possess high inhibitory activity.

## Supplementary Material

**Table S1: Modified heparin-like molecules tested in assays**

|                                                                   |
|-------------------------------------------------------------------|
| Mucosal Heparin (porcine) (MH)                                    |
| MH tNAc total deNS/reNAc (tNAc)                                   |
| MH gc (glycol split) periodate treated/NaBH <sub>4</sub> reduced. |
| MH gc deNS                                                        |
| MH gc (pNAc) i.e. partial deNS/reNAc (has NS/NAc)                 |
| MH gc (tNAc)                                                      |
| MH gc Smith deg ~4-5kDa 16mers                                    |
| MH gc de2S                                                        |
| MH gc de2S pNAc i.e. partial deNS/reNAc (has NS/NAc)              |
| MH gc de2S tNAc                                                   |
| MH gc epoxide i.e. part de2S                                      |
| MH de2S                                                           |
| MH de2S part deNS/NAc                                             |
| MH de2S total deNS/NAc                                            |
| MH de6S                                                           |
| MH gc de6S                                                        |
| MH gc de2S de6S                                                   |
| MH deS, reNS                                                      |
| MH gc deS, reNS                                                   |
| MH part de2S                                                      |
| MH gc butyrate (hydroxyl groups acylated)                         |
| MH gc hexyl                                                       |
| MH CR (carboxyl reduced)                                          |
| MH fully deS i.e. GlcNH-IdoA-                                     |
| LH (Bovine lung heparin) Calbiochem (90% GlcNS6S-IdoA2S)          |
| LH de2S (GlcNS6S-IdoA)                                            |
| LH de2S pNAc                                                      |
| LH de2S tNAc (GlcNAc6S-IdoA)                                      |
| LH de2S part gc split (A) 40-50% of UA residues split open        |
| LH de2S gc split part deNS/NAc                                    |
| LH de2S gc split total deNS/NAc (GlcNAc6S-Ido)                    |
| MH 5kDa LMWH (sigma)                                              |
| MH 5kDa gc split                                                  |
| MH 5kDa gc split part deNS/NAc                                    |
| MH 5kDa gc de2S                                                   |
| MH 5kDa part de2S gc                                              |
| MH 5kDa de2S                                                      |
| MH 5kDa de6S                                                      |
| LMWH ~3kDa,                                                       |
| MH H <sub>2</sub> O <sub>2</sub> 3-4kDa                           |
| MH H <sub>2</sub> O <sub>2</sub> 3-4kDa part deNS/NAc             |
| MH H <sub>2</sub> O <sub>2</sub> 3-4kDa gc split                  |
| MH H <sub>2</sub> O <sub>2</sub> 3-4kDa gc de2S                   |
| MH H <sub>2</sub> O <sub>2</sub> 3-4kDa gc de2S part deNS/NAc     |
| MH Sigma 3kDa                                                     |
| MH Sigma 3kDa gc                                                  |
| MH Sigma 3kDa de2S                                                |
| MH 3kDa gc de2S Sigma                                             |
| Enoxaparin 3kDa LMWH                                              |
| Enoxaparin gc 3kDa                                                |
| Bemiparin LMWH 3kDa                                               |
| Bemiparin gc                                                      |
| MH 3kDa-CHO ~3kDa                                                 |
| MH gc-3kDa-reduced                                                |
| MH gc-3kDa-NAc (deNS/reNAc)                                       |

MH 3kDa gc-CHO + 4-phenylsemicarbazide  
MH 3kDa gc-CHO + Benzhydrazide  
MH 3kDa gc-CHO + Anthranilic acid (NH<sub>2</sub>-Qm-COOH)  
MH 3kDa gc-CHO + ANTS (1,3,6 triSO<sub>3</sub>-aminonaphthaline)  
MHS Celsus #10595 12-15kDa Highly sulfated HS  
MHS Celsus HS1098 15kDa lowly sulfated HS  
Sulodexide (low sulfated heparin/low MW DS 80:20, orally available)  
Arixtra (Synthetic heparin pentasaccharide)  
Arixtra de2/3 deS  
Arixtra gc  
CS A (4S) whale cartilage  
CS A peroxide cleaved 2hr ~10kDa  
CS A peroxide cleaved 4hr ~5kDa  
CS B dermatan S (skin)  
CS C shark cartilage  
CS C peroxide cleaved 2hr ~10kDa  
CS C peroxide cleaved 4hr ~5kDa  
CS D shark cartilage  
Fucoidan

Abbreviations;

MH: Mucosal heparin (porcine),

MHS: Mucosal heparin sulfate (porcine)

LH: lung heparin (bovine) ~12.5kDa 90% GlcNS6S-IdoA2S (bovine)

gc: periodate treated (glycol split) to open non-sulfated GlcA/IdoA rings resulting in higher flexibility and no anticoagulant activity

de2S: removal of 2S group from IdoA2S resulting in low/no anticoagulant and less protein binding

de6S: removes 6S from GlcNS6S i.e. GlcNS-IdoA2S

pNAc: partially deNS (~50%) to replace NS residues with NAc resulting in 50% less N-sulfation

NAc: fully deNS and reNAc resulting in compounds with no anticoagulant activity and reduced protein binding

CR : decarboxylated, that is -COOH motifs become -CH<sub>2</sub>OH resulting in no anticoagulation activity

MH-butyrate: OH groups are esterified with the corresponding anhydride

**Supplementary Table 2: Source of compound precursor and preparation method of sulfated polysaccharides**

| <b>Compound</b>                 | <b>Source</b>              | <b>Preparation method(s)</b>                                         |
|---------------------------------|----------------------------|----------------------------------------------------------------------|
| i-carrageenan                   | Sigma-Aldrich              | Chlorosulfonic acid                                                  |
| k-carrageenan                   | Dextra Laboratories        | Chlorosulfonic acid                                                  |
| λ-carrageenan                   | Dextra Laboratories        | Chlorosulfonic acid or Pyridine sulfur trioxide <sup>†</sup>         |
| Agarose sulfate                 | Sigma-Aldrich              | Chlorosulfonic acid or Pyridine sulfur trioxide <sup>†</sup>         |
| Alginic sulfate                 | Sigma-Aldrich              | Chlorosulfonic acid or Piperidine-N-sulfonic acid <sup>\$</sup>      |
| Amylopectin sulfate             | Sigma-Aldrich              | Chlorosulfonic acid                                                  |
| Amylose sulfate                 | Sigma-Aldrich              | Chlorosulfonic acid                                                  |
| Arabic sulfate                  | Sigma-Aldrich              | Chlorosulfonic acid or Piperidine-N-sulfonic acid <sup>\$</sup>      |
| Ardeparin                       | Celsus Glycoscience        | N/A                                                                  |
| Carboxymethyl cellulose sulfate | Sigma-Aldrich              | Chlorosulfonic acid                                                  |
| Certoparin                      | Novartis                   | N/A                                                                  |
| Chitosan sulfate                | Dextra Laboratories        | Chlorosulfonic acid or Pyridine sulfur trioxide <sup>†</sup>         |
| Curdlan sulfate <sup>\$</sup>   | WAKO Chemicals             | Piperidine-N-sulfonic acid <sup>\$</sup>                             |
| Cyclodextrin sulfate            | Sigma-Aldrich              | Chlorosulfonic acid                                                  |
| Danaparoid                      | EDQM (Conseil de l'Europe) | N/A                                                                  |
| Ethyl cellulose sulfate         | Sigma-Aldrich              | Chlorosulfonic acid                                                  |
| Fucogalactan sulfate            | Dextra Laboratories        | Chlorosulfonic acid                                                  |
| Gellan sulfate                  | Sigma-Aldrich              | Chlorosulfonic acid                                                  |
| Ghatti Sulfate                  | Sigma-Aldrich              | Chlorosulfonic acid or Pyridine sulfur trioxide <sup>†</sup>         |
| Glycogen sulfate                | Sigma-Aldrich              | Chlorosulfonic acid                                                  |
| Guar sulfate                    | Sigma-Aldrich              | Chlorosulfonic acid or Pyridine sulfur trioxide <sup>†</sup>         |
| Gum Rosin sulfate               | Sigma-Aldrich              | Chlorosulfonic acid                                                  |
| Hydroxyethyl cellulose sulfate  | Sigma-Aldrich              | Chlorosulfonic acid                                                  |
| Hypromellose sulfate            | Sigma-Aldrich              | Chlorosulfonic acid                                                  |
| Inulin sulfate                  | Sigma-Aldrich              | Chlorosulfonic acid                                                  |
| Karaya sulfate                  | Sigma-Aldrich              | Chlorosulfonic acid                                                  |
| Konjac glucomannan sulfate      | Dextra Laboratories        | Chlorosulfonic acid                                                  |
| Levan sulfate                   | Sigma-Aldrich              | Chlorosulfonic acid                                                  |
| Locust bean gum sulfate         | Sigma-Aldrich              | Chlorosulfonic acid or Pyridine sulfur trioxide <sup>†</sup>         |
| Methylcellulose sulfate         | Sigma-Aldrich              | Chlorosulfonic acid                                                  |
| Paramylon sulfate               | WAKO Chemicals             | Chlorosulfonic acid                                                  |
| Pectin sulfate                  | Sigma-Aldrich              | Pyridine sulfur trioxide or Piperidine-N-sulfonic acid <sup>\$</sup> |
| Penoxyacetyl cellulose sulfate  | Sigma-Aldrich              | Chlorosulfonic acid                                                  |
| Propyleneglycol alginic sulfate | Dextra Laboratories        | Chlorosulfonic acid                                                  |
| Propylmethyl sulfate            | Sigma-Aldrich              | Chlorosulfonic acid                                                  |
| Psyllium seed gum sulfate       | Dextra Laboratories        | Chlorosulfonic acid                                                  |
| Psyllium sulfate                | Sigma-Aldrich              | Chlorosulfonic acid                                                  |
| Pullulan sulfate                | Sigma-Aldrich              | Pyridine sulfur trioxide                                             |

|                      |                            |                                                              |
|----------------------|----------------------------|--------------------------------------------------------------|
| Scleroglucan sulfate | Dextra Laboratories        | Chlorosulfonic acid or Pyridine sulfur trioxide <sup>†</sup> |
| Starch sulfate       | Sigma-Aldrich              | Chlorosulfonic acid                                          |
| Storax sulfate       | Sigma-Aldrich              | Chlorosulfonic acid                                          |
| Sulodexide           | Celsus Glycoscience        | Chlorosulfonic acid                                          |
| Tara sulfate         | Sigma-Aldrich              | Chlorosulfonic acid                                          |
| Taramind sulfate     | Sigma-Aldrich              | Chlorosulfonic acid                                          |
| Tinzaparin           | EDQM (Conseil de l'Europe) | N/A                                                          |
| Tragacanth sulfate   | Sigma-Aldrich              | Chlorosulfonic acid                                          |
| Tylose sulfate       | Sigma-Aldrich              | Chlorosulfonic acid                                          |
| Welan sulfate        | Dextra Laboratories        | Chlorosulfonic acid                                          |
| Xanthan sulfate      | Sigma-Aldrich              | Chlorosulfonic acid                                          |
| Xylan sulfate        | Sigma-Aldrich              | Chlorosulfonic acid                                          |

**Supplementary Table 3: Anticoagulant potential of sulfated compounds possessing potent inhibitory potential as assessed by activated partial thromboplastin time.**

| <b>Compound</b>                                       | <b>EC<sub>50</sub> aPTT (ug.mL<sup>-1</sup>)</b> | <b>Ratio EC<sub>50</sub><sup>Compound</sup> / EC<sub>50</sub><sup>Hep</sup></b> |
|-------------------------------------------------------|--------------------------------------------------|---------------------------------------------------------------------------------|
| Porcine Mucosal Heparin (Na <sup>+</sup> ; Applichem) | 0.27                                             | 1                                                                               |
| Dextran sulfate <sup>†</sup>                          | 40.12                                            | 149                                                                             |
| Chemically over-sulfated i-carrageenan                | 7.56                                             | 28                                                                              |
| Inulin sulfate                                        | 1151.00                                          | 4263                                                                            |
| Chemically over-sulfated λ-carrageenan <sup>†</sup>   | 4.13                                             | 15                                                                              |
| Propyleneglycol alginic sulfate                       | 6.29                                             | 23                                                                              |
| Psyllium sulfate                                      | 2.64                                             | 10                                                                              |
| Pullulan sulfate <sup>†</sup>                         | 2.59                                             | 10                                                                              |
| Scleroglucan sulfate                                  | 5.43                                             | 20                                                                              |
| Tragacanth sulfate                                    | 4.85                                             | 18                                                                              |
| Xylan sulfate <sup>#</sup>                            | 0.53                                             | 2                                                                               |
